# Supplementary material for: Source-sector contributions to European ozone and fine PM in 2010using AQMEII modeling data
Source: Copernicus journal article supplement (doi:10.5194/acp-2016-973), 2016-11-11
Supplement: Supplementary file 1 [file acp-2016-973-supplement.pdf]

## Supplementary Information

- A. Emissions
- B. Model Performance Evaluation

## A. Emissions

**Table A1.** Daily average SNAP sector emissions in August 2010.

| SNAP Sector                                                  | Emissions (kg/day) |               |                   |               |                 |               |
|--------------------------------------------------------------|--------------------|---------------|-------------------|---------------|-----------------|---------------|
|                                                              | NO <sub>x</sub>    |               | PM <sub>2.5</sub> |               | SO <sub>2</sub> |               |
|                                                              | Area sources       | Point sources | Area sources      | Point sources | Area sources    | Point sources |
| SNAP 1: Energy                                               | 0                  | 1201          | 0                 | 8523          | 0               | 1535          |
| SNAP 2:<br>Residential<br>Combustion                         | 497                | 133           | 633               | 5223          | 464             | 60            |
| SNAP 34:<br>Industry*                                        | 0                  | 428           | 0                 | 10217         | 0               | 494           |
| SNAP 5:<br>Extraction and<br>Distribution of<br>Fossil Fuels | 198                | 28            | 339               | 1484          | 814             | 56            |
| SNAP 6: Solvent<br>and Product use                           | 5                  | 0             | 744               | 0             | 6               | 0             |
| SNAP 7: Road<br>transport                                    | 161684             | 0             | 12935             | 0             | 3067            | 0             |
| SNAP 8: Non-<br>road transport                               | 187226             | 0             | 26975             | 0             | 113166          | 0             |
| SNAP 9: Waste<br>treatment                                   | 11                 | 8             | 55                | 1331          | 3               | 1             |
| SNAP 10:<br>Agriculture                                      | 936                | 0             | 16670             | 0             | 244             | 0             |

\* Includes industrial combustion and industrial processes, previously SNAP sectors 3 and 4 respectively

**Table A1.** Daily average SNAP sector emissions in February 2010.

| SNAP Sector                                                  | Emissions (kg/day) |               |                   |               |                 |               |
|--------------------------------------------------------------|--------------------|---------------|-------------------|---------------|-----------------|---------------|
|                                                              | NO <sub>x</sub>    |               | PM <sub>2.5</sub> |               | SO <sub>2</sub> |               |
|                                                              | Area sources       | Point sources | Area sources      | Point sources | Area sources    | Point sources |
| SNAP 1: Energy                                               | 0                  | 1793          | 0                 | 12739         | 0               | 2274          |
| SNAP 2:<br>Residential<br>Combustion                         | 3644               | 976           | 5960              | 49145         | 5148            | 663           |
| SNAP 34:<br>Industry <sup>*</sup>                            | 0                  | 579           | 0                 | 14140         | 0               | 672           |
| SNAP 5:<br>Extraction and<br>Distribution of<br>Fossil Fuels | 197                | 28            | 339               | 1482          | 813             | 56            |
| SNAP 6: Solvent<br>and Product use                           | 4                  | 0             | 644               | 0             | 5               | 0             |
| SNAP 7: Road<br>transport                                    | 147013             | 0             | 11815             | 0             | 2786            | 0             |
| SNAP 8: Non-<br>road transport                               | 186988             | 0             | 26874             | 0             | 113394          | 0             |
| SNAP 9: Waste<br>treatment                                   | 11                 | 8             | 55                | 1331          | 3               | 1             |
| SNAP 10:<br>Agriculture                                      | 138                | 0             | 2177              | 0             | 94              | 0             |

<sup>\*</sup> Includes industrial combustion and industrial processes, previously SNAP sectors 3 and 4 respectively

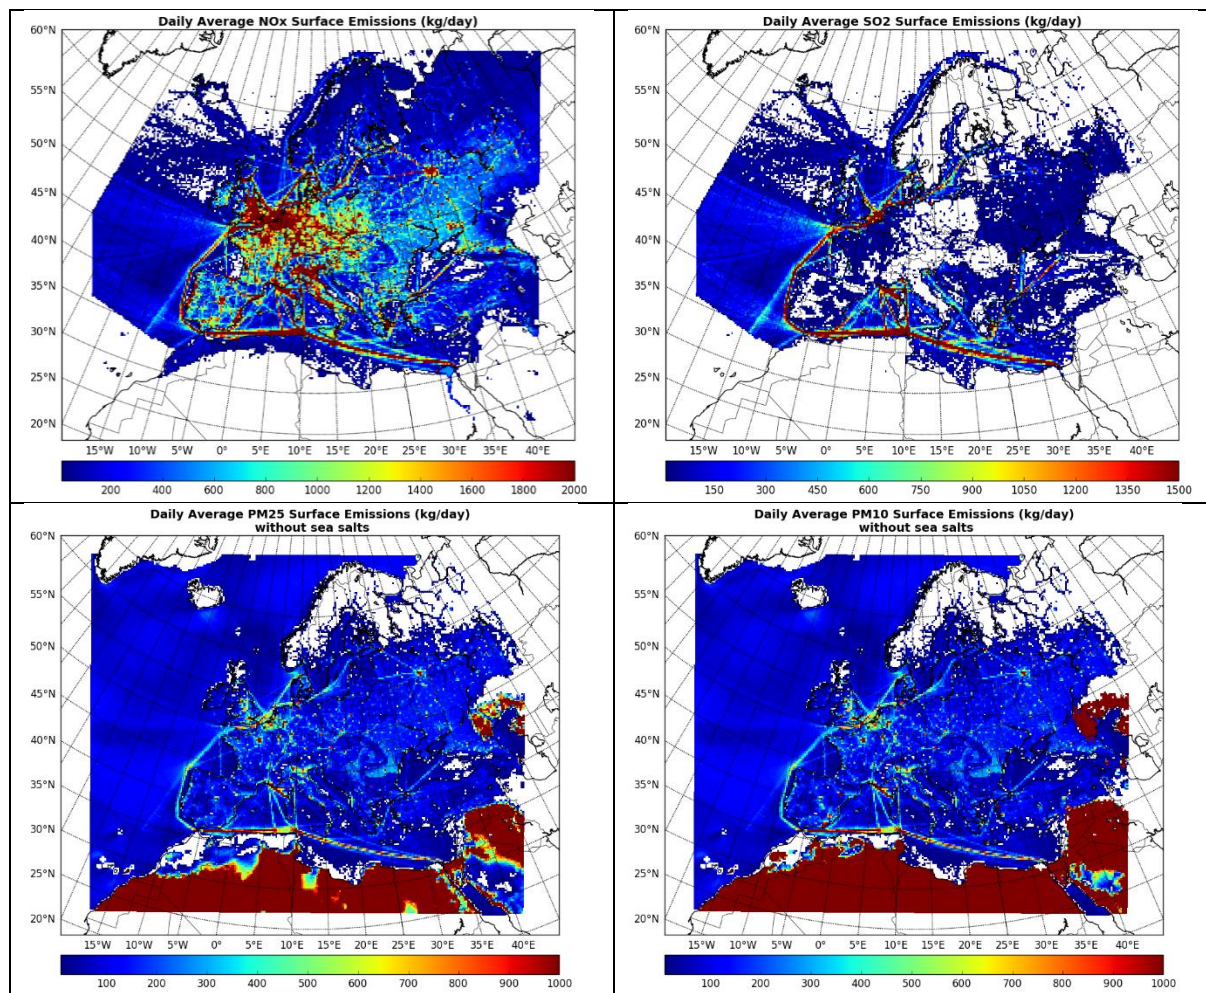

**Figure A1.** Daily average total NO<sub>x</sub>, SO<sub>2</sub>, PM<sub>2.5</sub> and PM<sub>10</sub> surface emissions in August 2010.

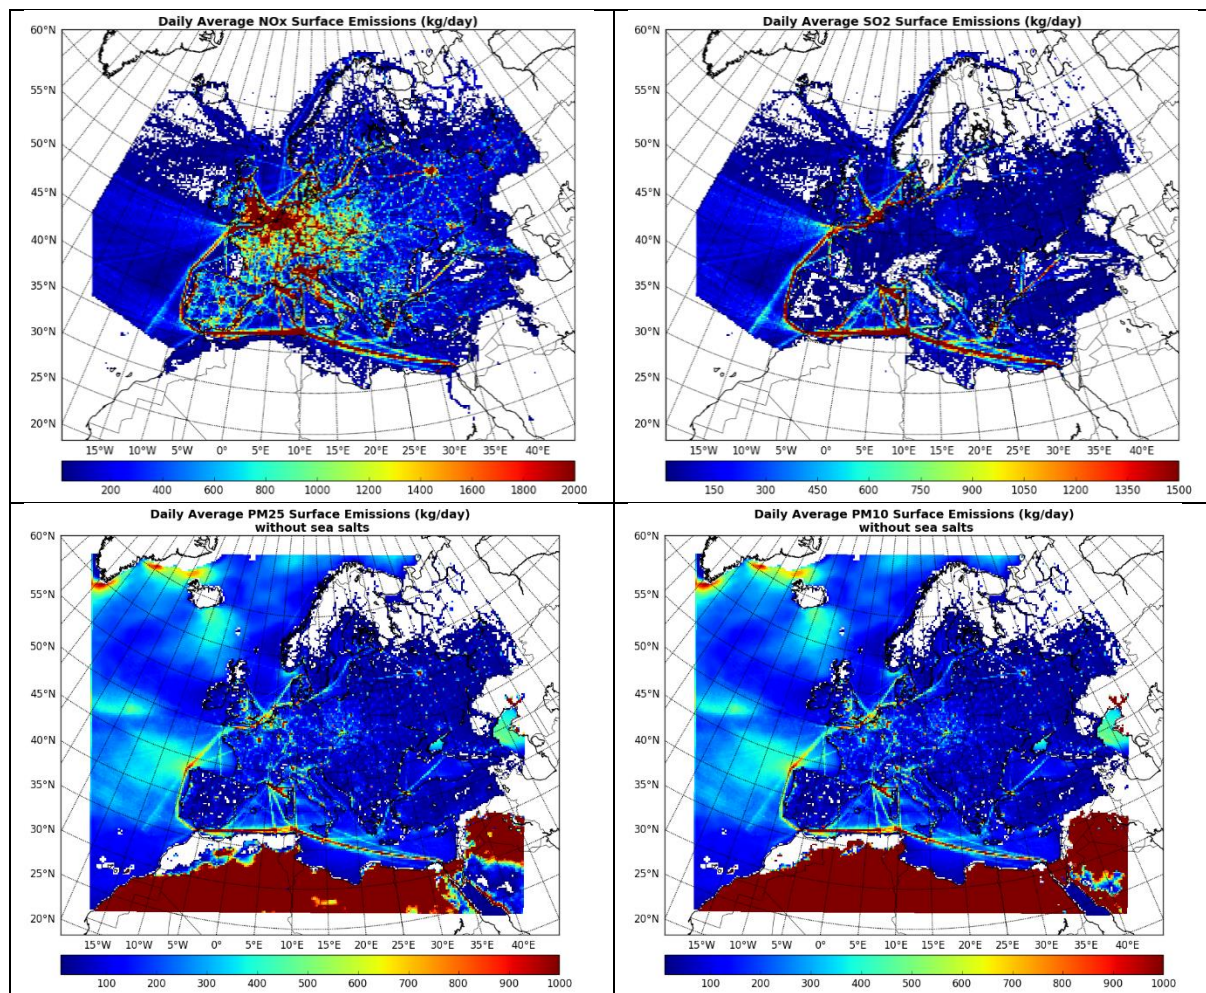

**Figure A2.** Daily average total NO<sub>x</sub>, SO<sub>2</sub>, PM<sub>2.5</sub> and PM<sub>10</sub> surface emissions in February 2010.



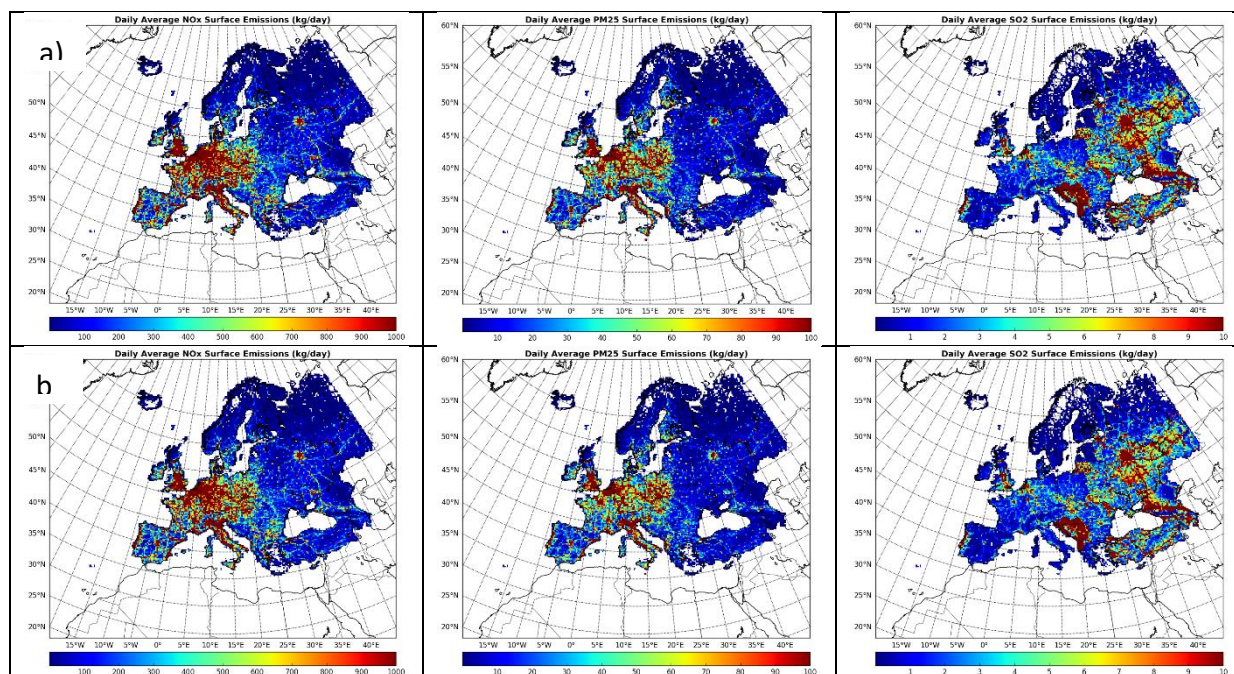

**Figure A3.** Daily average NO<sub>x</sub>, PM<sub>2.5</sub> and SO<sub>2</sub> surface emissions from SNAP Sector 7 (road transport) in a) August 2010 and b) February 2010.

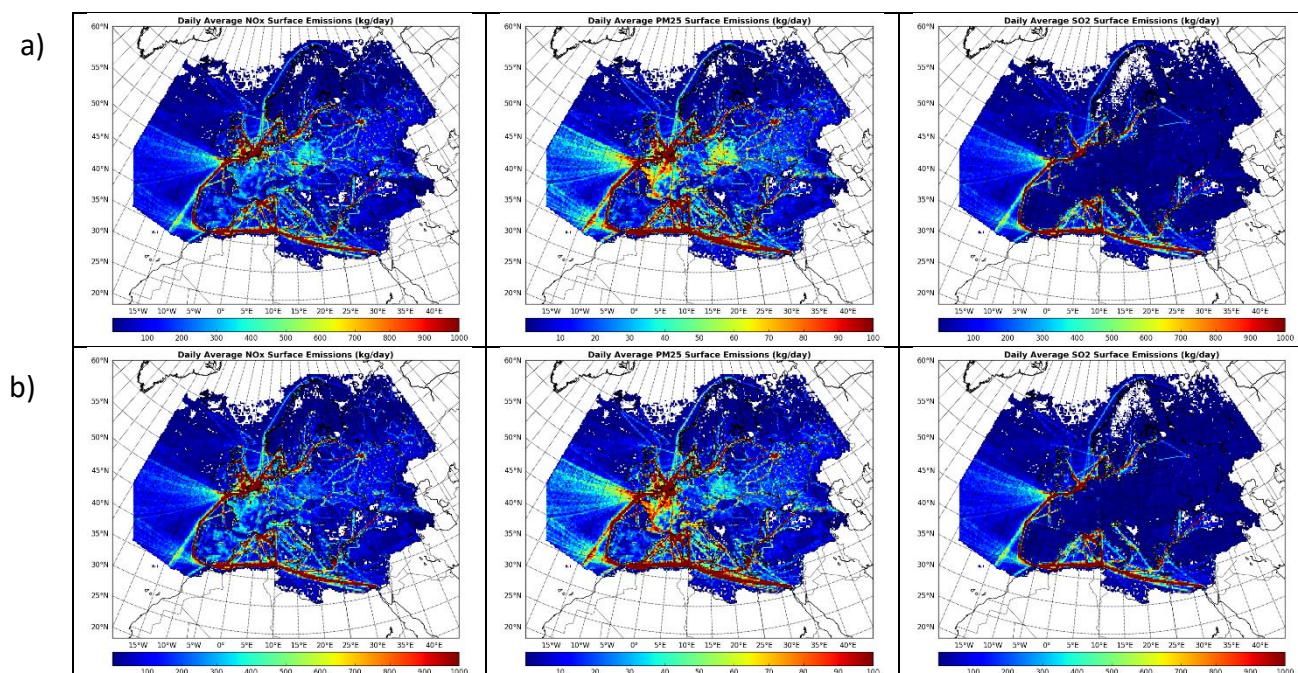

**Figure A4.** Daily average NO<sub>x</sub>, PM<sub>2.5</sub> and SO<sub>2</sub> surface emissions from SNAP Sector 8 (non-road transport) in a) August 2010 and b) February 2010.

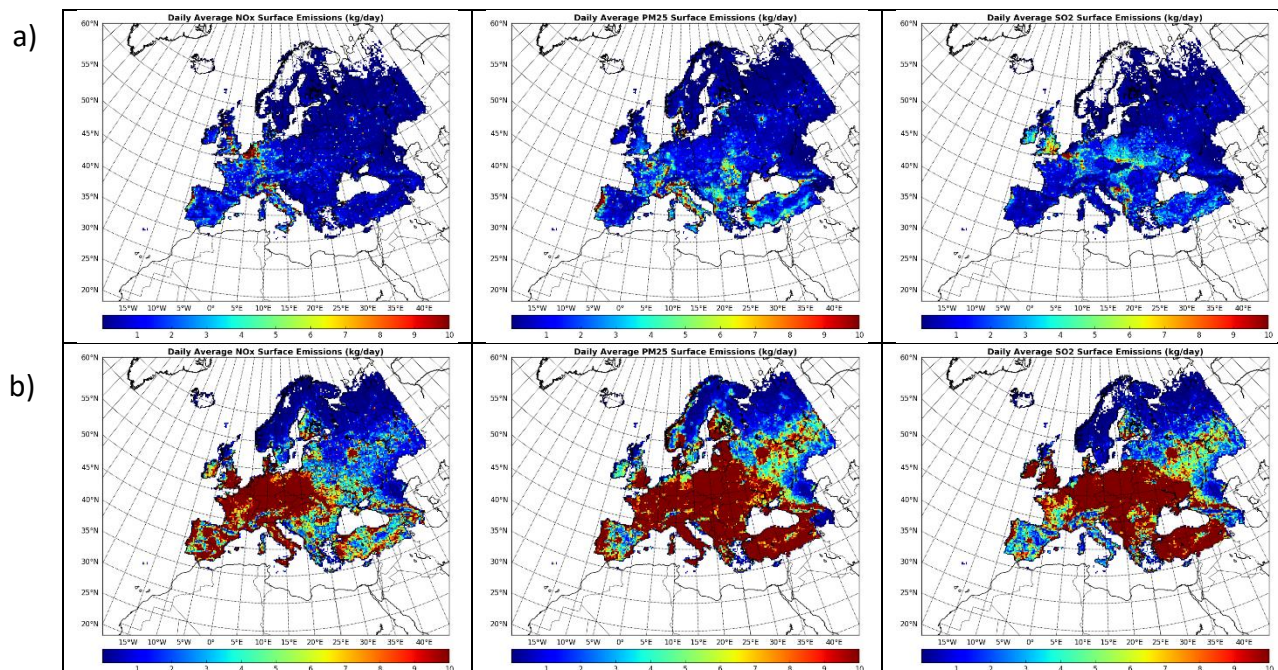

**Figure A5.** Daily average NO<sub>x</sub>, PM<sub>2.5</sub> and SO<sub>2</sub> surface emissions from SNAP Sector 2 (residential combustion) in a) August 2010 and b) February 2010.

## B. Model Performance Evaluation

### B1. Statistical indicators for model performance evaluation

The statistical indicators selected to evaluate the model performances have been defined as follows:

Normalized Mean Bias (NMB):

$$NMB = \frac{\frac{1}{N} \sum_{t=1}^N (C_{\text{mod}}(x, t) - C_{\text{obs}}(x, t))}{\frac{1}{N} \sum_{t=1}^N C_{\text{obs}}(x, t)} \quad (\text{B.1})$$

Normalized Mean Error (NME):

$$NME = \frac{\frac{1}{N} \sum_{t=1}^N |C_{\text{mod}}(x, t) - C_{\text{obs}}(x, t)|}{\frac{1}{N} \sum_{t=1}^N C_{\text{obs}}(x, t)} \quad (\text{B.2})$$

Mean Fractional Bias (FB)

$$FB = \frac{1}{N} \sum_{t=1}^N \frac{C_{\text{mod}}(x, t) - C_{\text{obs}}(x, t)}{(C_{\text{obs}}(x, t) + C_{\text{mod}}(x, t)) / 2} \quad (\text{B.3})$$

Mean Fractional Error (FE)

$$FE = \frac{1}{N} \sum_{t=1}^N \frac{|C_{\text{mod}}(x, t) - C_{\text{obs}}(x, t)|}{(C_{\text{obs}}(x, t) + C_{\text{mod}}(x, t)) / 2} \quad (\text{B.4})$$



Correlation Index (r)

$$r = \frac{\sum_{t=1}^N (C_{\text{mod}}(x, t) - \bar{C}_{\text{mod}}(x)) \cdot (C_{\text{obs}}(x, t) - \bar{C}_{\text{obs}}(x))}{\sqrt{\sum_{t=1}^N (C_{\text{mod}}(x, t) - \bar{C}_{\text{mod}}(x))^2} \cdot \sqrt{\sum_{t=1}^N (C_{\text{obs}}(x, t) - \bar{C}_{\text{obs}}(x))^2}} \quad (\text{B.5})$$

Index of Agreement (IA)

$$IA = 1 - \frac{\sum_{t=1}^N (C_{\text{mod}}(x, t) - C_{\text{obs}}(x, t))^2}{\sum_{t=1}^N \left( |C_{\text{mod}}(x, t) - \bar{C}_{\text{obs}}(x)| + |C_{\text{obs}}(x, t) - \bar{C}_{\text{obs}}(x)| \right)^2} \quad (\text{B.6})$$

Root Mean Square Error (RMSE)

$$RMSE = \sqrt{\frac{1}{N} \sum_{t=1}^N (C_{\text{mod}}(x, t) - C_{\text{obs}}(x, t))^2} \quad (\text{B.7})$$

## B2. Spatial performance evaluation

The spatial distribution of CAMx performance is reported in Figures B1 through B12 for both AB and RB sites.

SO<sub>2</sub> concentration is correctly reproduced in Central-Western Europe, while it is partially underestimated at Spanish sites and in the Po Valley. A more systematic underestimation is shown for Eastern Europe, that is characterized by the highest observed concentrations (yearly mean values greater than 4 ppb). SO<sub>2</sub> underestimation in Eastern Europe may imply a corresponding underestimation of the sulphate contribution to the total PM concentrations. When limiting the analysis to RB sites (Figure B2), we observe a better and more homogenous level of performance indicating that SO<sub>2</sub> underestimation in East EU is mostly related to urban sources.

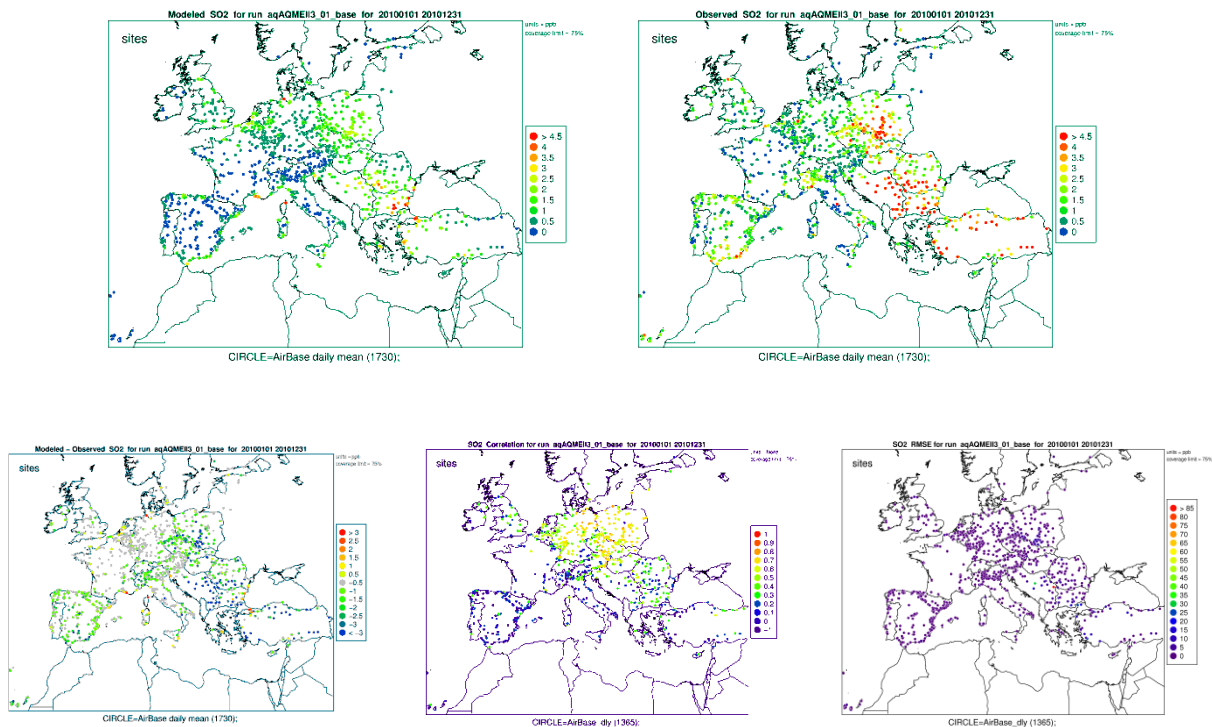

**Figure B1 – Evaluation of CAMx performance for SO<sub>2</sub> at AB Airbase sites. Top panel: modelled and observed yearly mean concentrations. Bottom panel: yearly mean BIAS, Correlation and RMSE values computed for daily concentrations.**

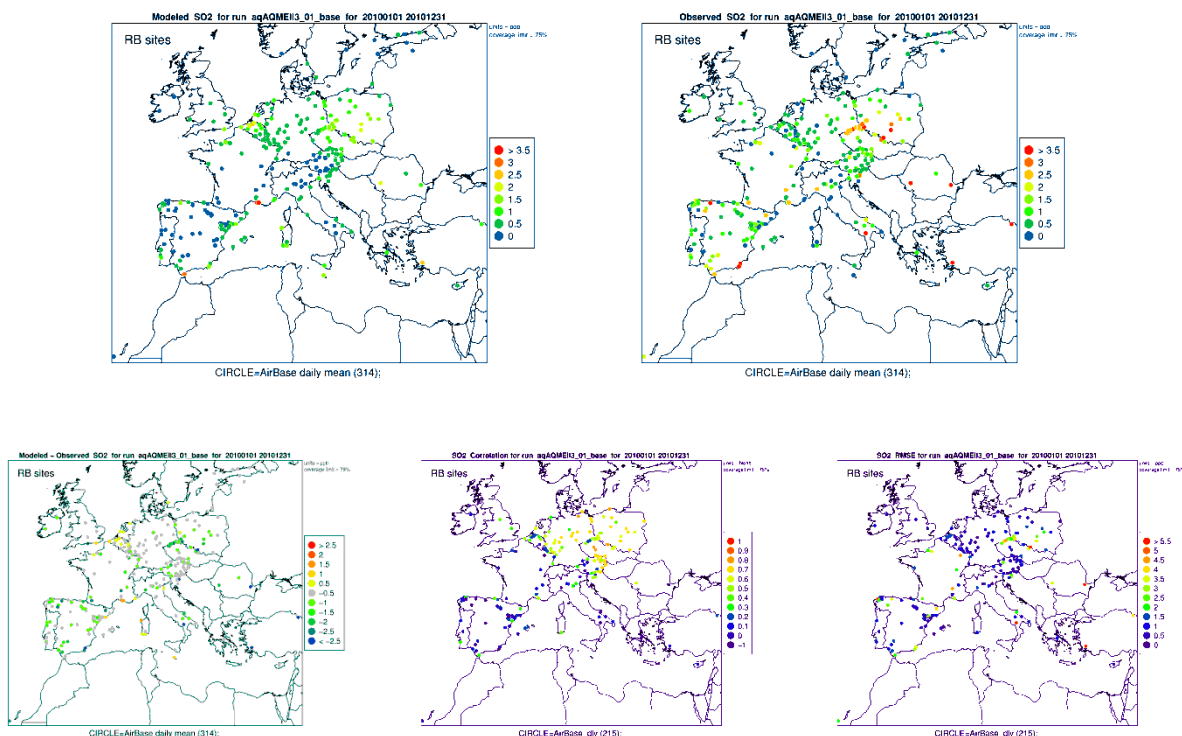

**Figure B2 – Evaluation of CAMx performance for SO<sub>2</sub> at RB Airbase sites. Top panel: modelled and observed yearly mean concentrations. Bottom panel: yearly mean BIAS, Correlation and RMSE values computed for daily concentrations.**

NO<sub>2</sub> performance is shown in Figures B3 and B4. NO<sub>2</sub> concentrations are generally underestimated but the mean BIAS is lower than 5 ppb at most of central and Western Europe sites. Higher underestimations are observed Italy and Eastern Europe. Correlation is higher than 0.5 at most of continental sites, while a more systematic decrease of model performance is observed along the coasts (e.g. Spain, Italy). This may suggest that evolution of the main sources at sea-land interface is not correctly reproduced. As expected, BIAS clearly decreases when moving to RB sites only, with yearly RMSE lower than 4-6 ppb at most sites. Conversely CAMs still shows a worsening in temporal correlation from in-land to coastal sites.

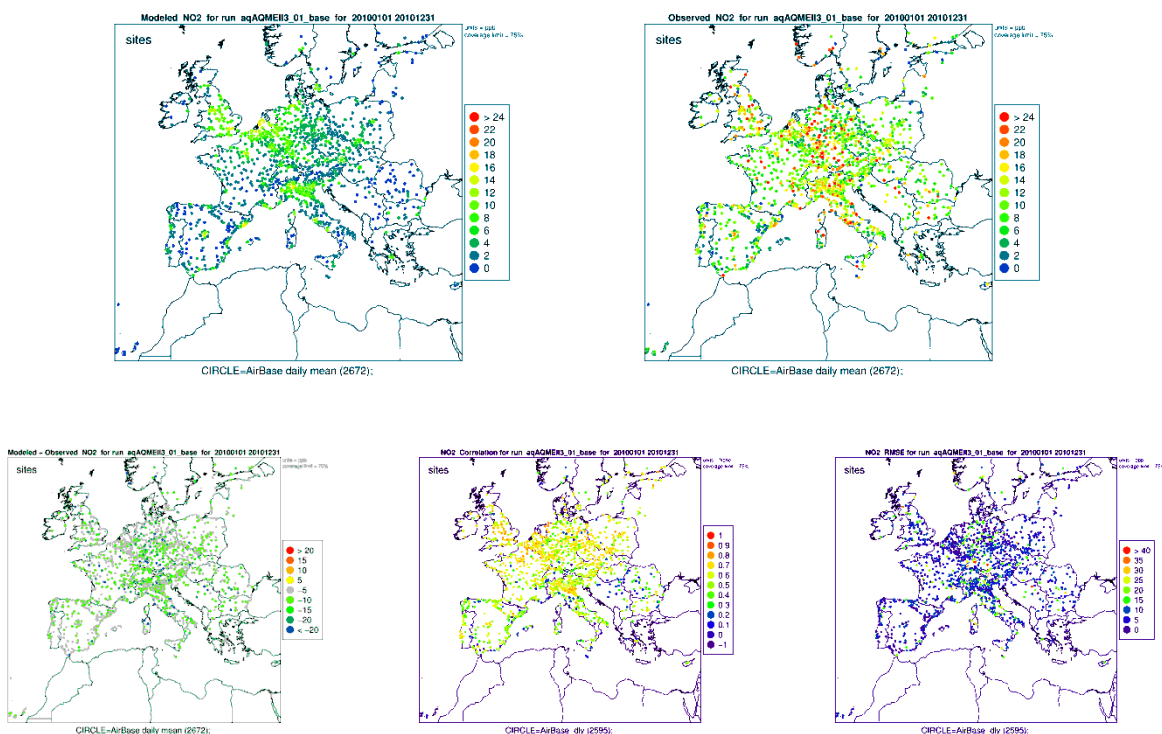

**Figure B3 – Evaluation of CAMx performance for NO<sub>2</sub> at AB Airbase sites. Top panel: modelled and observed yearly mean concentrations. Bottom panel: yearly mean BIAS, Correlation and RMSE values computed for daily concentrations.**



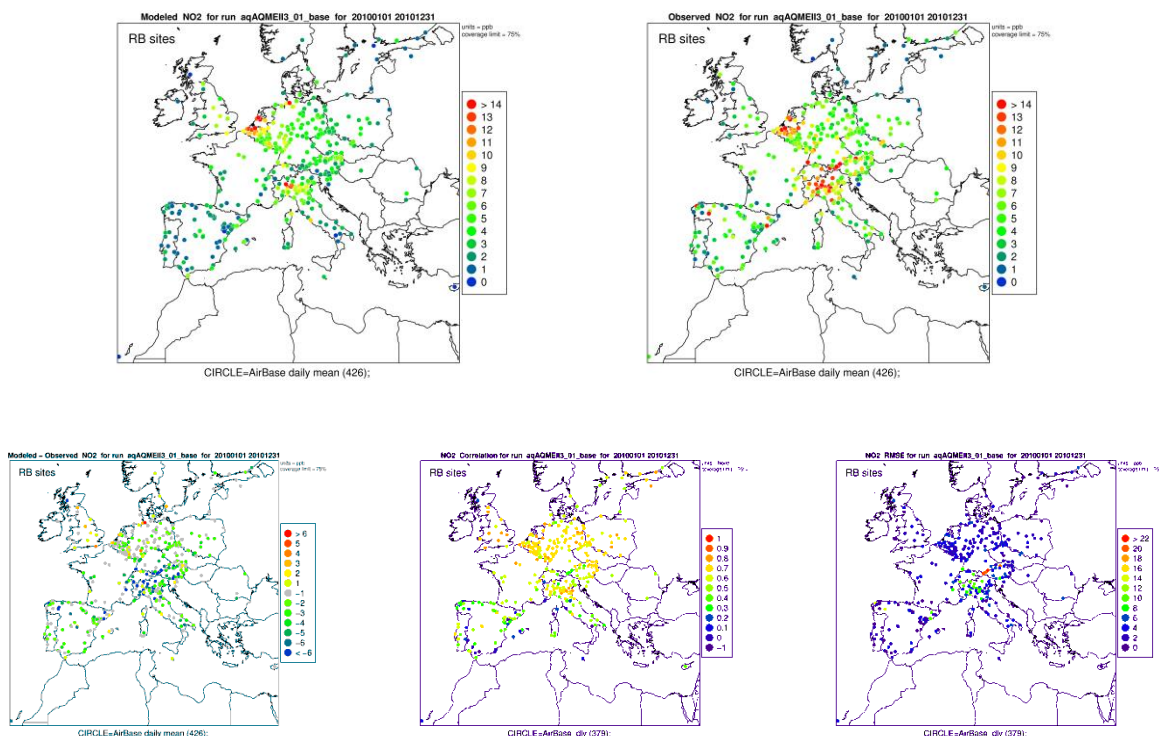

**Figure B4 – Evaluation of CAMx performance for NO<sub>2</sub> at RB Airbase sites. Top panel: modelled and observed yearly mean concentrations. Bottom panel: yearly mean BIAS, Correlation and RMSE values computed for daily concentrations.**

Ozone concentration shows a clear increasing gradient moving from NW to SE, stronger than the measured one. Indeed, observed concentrations are correctly reproduced over the whole Western and Central Europe, but overestimated in the Mediterranean areas.

Such a discrepancy is clearly shown in the map of the mean bias for both AB (Figure B5) and RB (Figure B6) sites. Considering both BIAS and RMSE it can be noted that strongest overestimations take place in Italy (particularly in the complex region surrounding the Po Valley) and in SE Europe. This result could be influenced by two different source of error: an excess of downward vertical transport over complex terrain regions (e.g. the Alps) and an overestimation of the ozone accumulation and transport within the marine boundary layer in the Mediterranean Sea.

Temporal correlation is very well reproduced over the whole domain (higher than 0.7), again with the exception of some coastal sites where correlation decreases to 0.5-0.4.

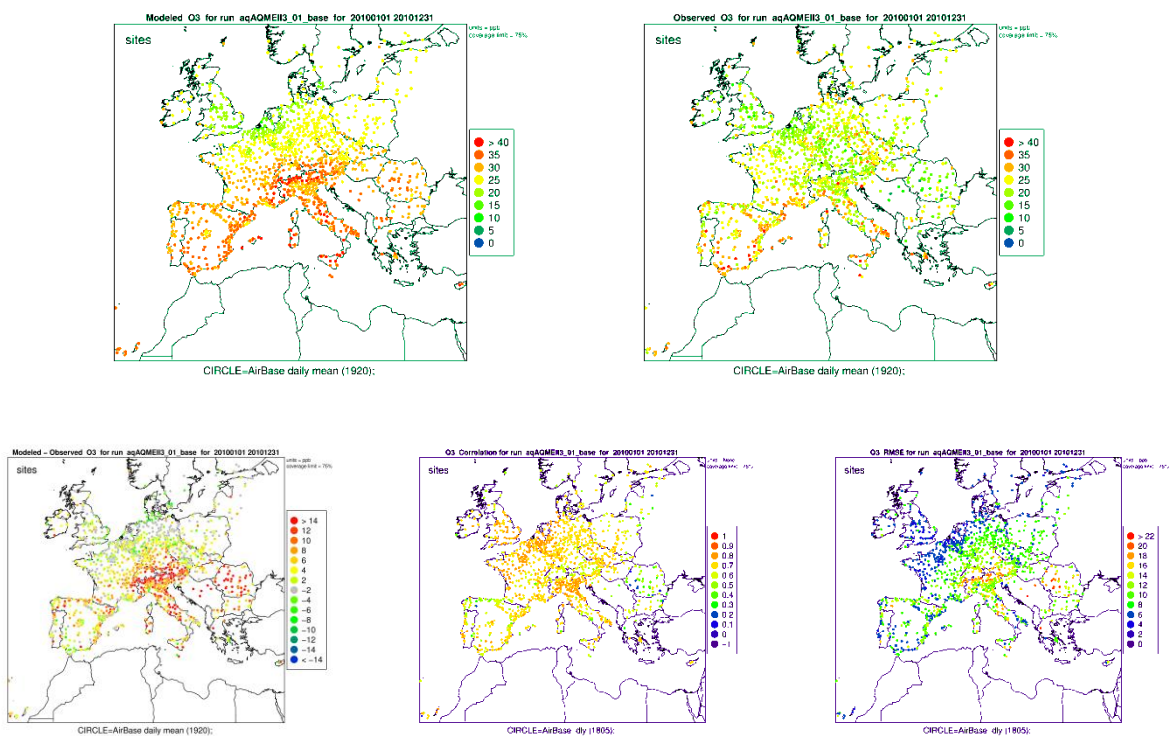

**Figure B5 – Evaluation of CAMx performance for O<sub>3</sub> at AB Airbase sites. Top panel: modelled and observed yearly mean concentrations. Bottom panel: yearly mean BIAS, Correlation and RMSE values computed for daily concentrations.**

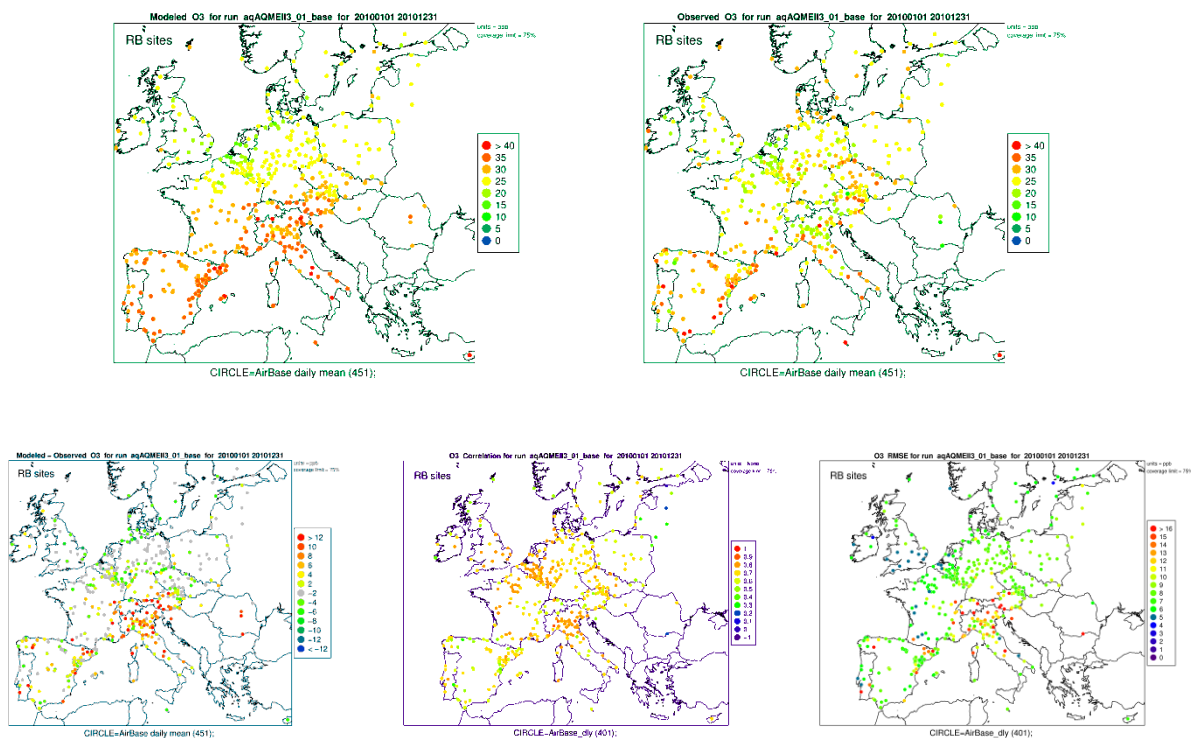

**Figure B6 – Evaluation of CAMx performance for O<sub>3</sub> at RB Airbase sites. Top panel: modelled and observed yearly mean concentrations. Bottom panel: yearly mean BIAS, Correlation and RMSE values computed for daily concentrations.**

The spatial pattern of O<sub>x</sub> performance indicators (Figures B7 and B8) is similar to ozone, but with a clear reduction of the mean bias and RMSE values. Considering that O<sub>x</sub> removes the effect of the local underestimation of NO<sub>x</sub> titration, the spatial pattern of BIAS seems to confirm that there is an excess of ozone in the Mediterranean area.

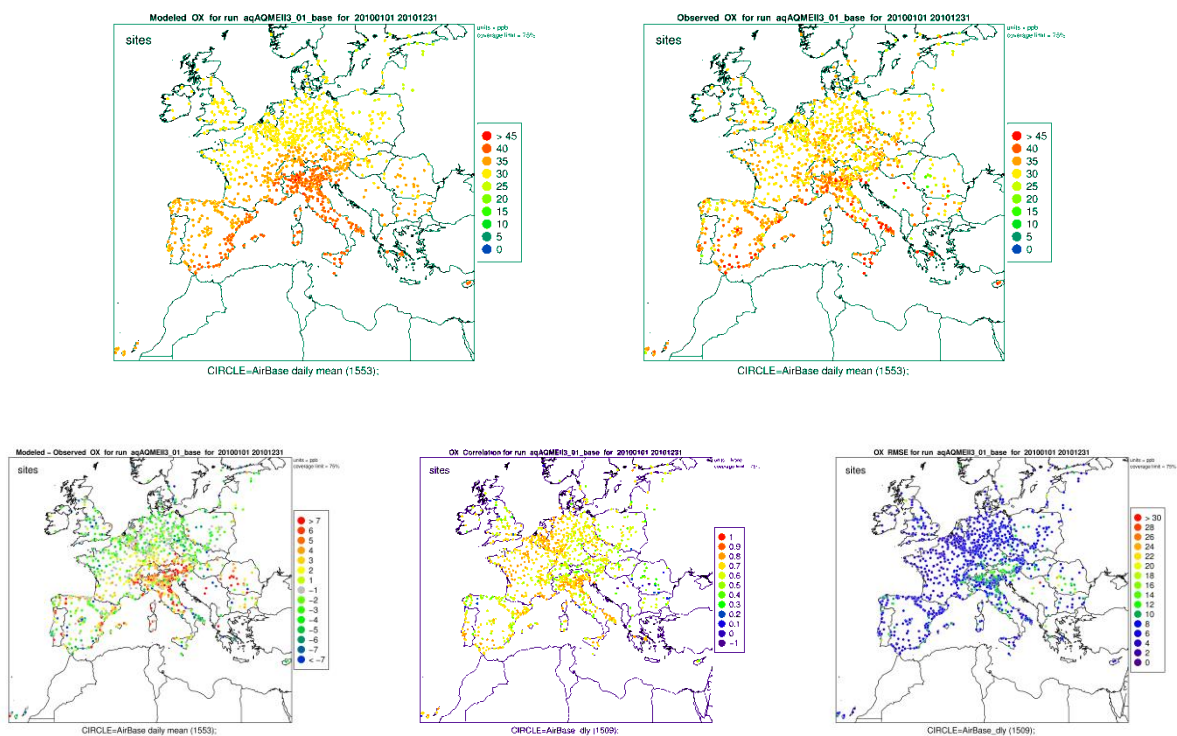

**Figure B7 – Evaluation of CAMx performance for  $O_3$  at AB Airbase sites. Top panel: modelled and observed yearly mean concentrations. Bottom panel: yearly mean BIAS, Correlation and RMSE values computed for daily concentrations.**



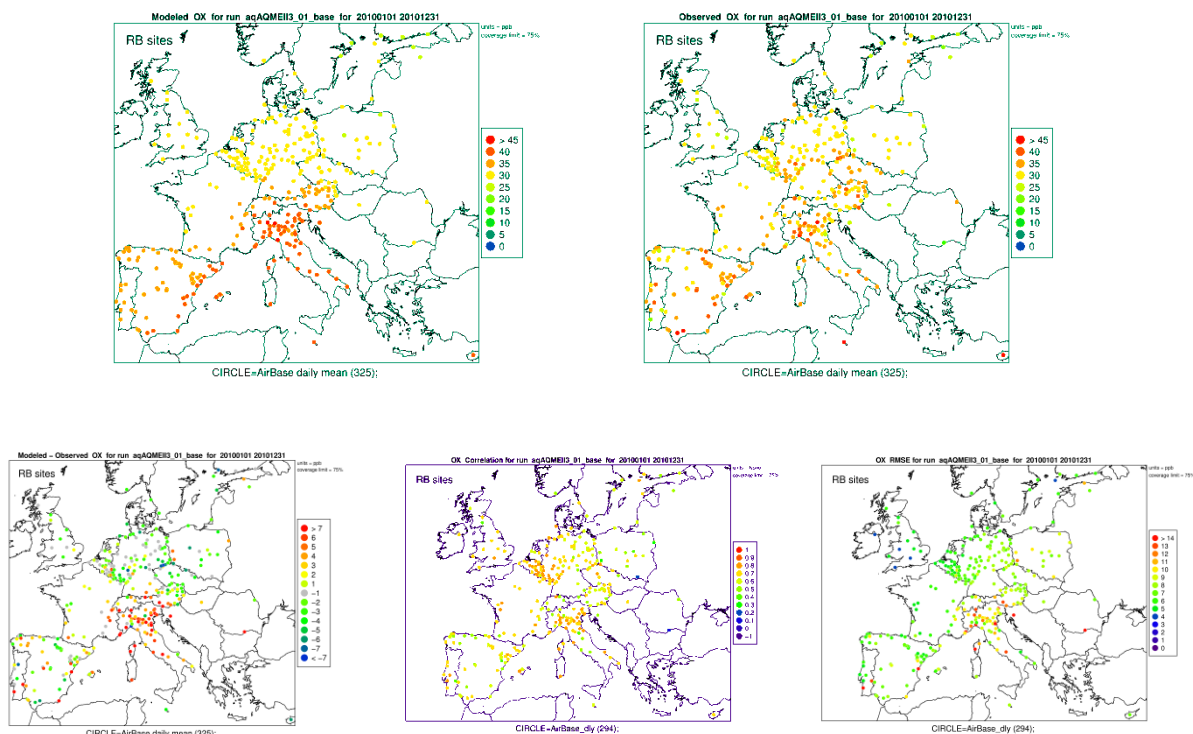

**Figure B8 – Evaluation of CAMx performance for O<sub>3</sub> at RB Airbase sites. Top panel: modelled and observed yearly mean concentrations. Bottom panel: yearly mean BIAS, Correlation and RMSE values computed for daily concentrations.**

The spatial pattern of the PM<sub>10</sub> performance indicators (Figure B9 and Figure B10) provide several interesting information. PM<sub>10</sub> is correctly reproduced in a wide area of Western and Central Europe ranging from Spain to Western Poland (BIAS ranging between  $\pm 5 \mu\text{g}/\text{m}^3$ ). Differently, PM<sub>10</sub> concentrations are systematically overestimated in UK and along the English Channel. These results could be related to a possible overestimation of sea salt contribution from Atlantic Ocean. This result seems confirmed also by the poor CAMx performance in reproducing temporal correlation over such area.

In Eastern and Mediterranean Europe PM<sub>10</sub> concentrations are underestimated, as shown also in previous studies. PM<sub>10</sub> underestimation in Eastern Europe are generally due to an underestimation of the strengths of the main sources influencing both primary compounds (e.g. Primary Organic Aerosol from biomass burning) and secondary species (e.g. Sulphate). PM<sub>10</sub> underestimation in North and Central Italy, particularly in the Po Valley, are generally related to the underestimation of the strong stable conditions taking place during the cold season and giving rise to very severe PM episodes.

The results seem confirmed by the analysis of the RB subset, showing that PM<sub>10</sub> concentrations are still overestimated in UK and close to the Channel, stating the probable influence of sea salt. Differently in Italy and Eastern EU, we can observe an increase in model performance, due to the weaker influence of urban sources at RB sites.

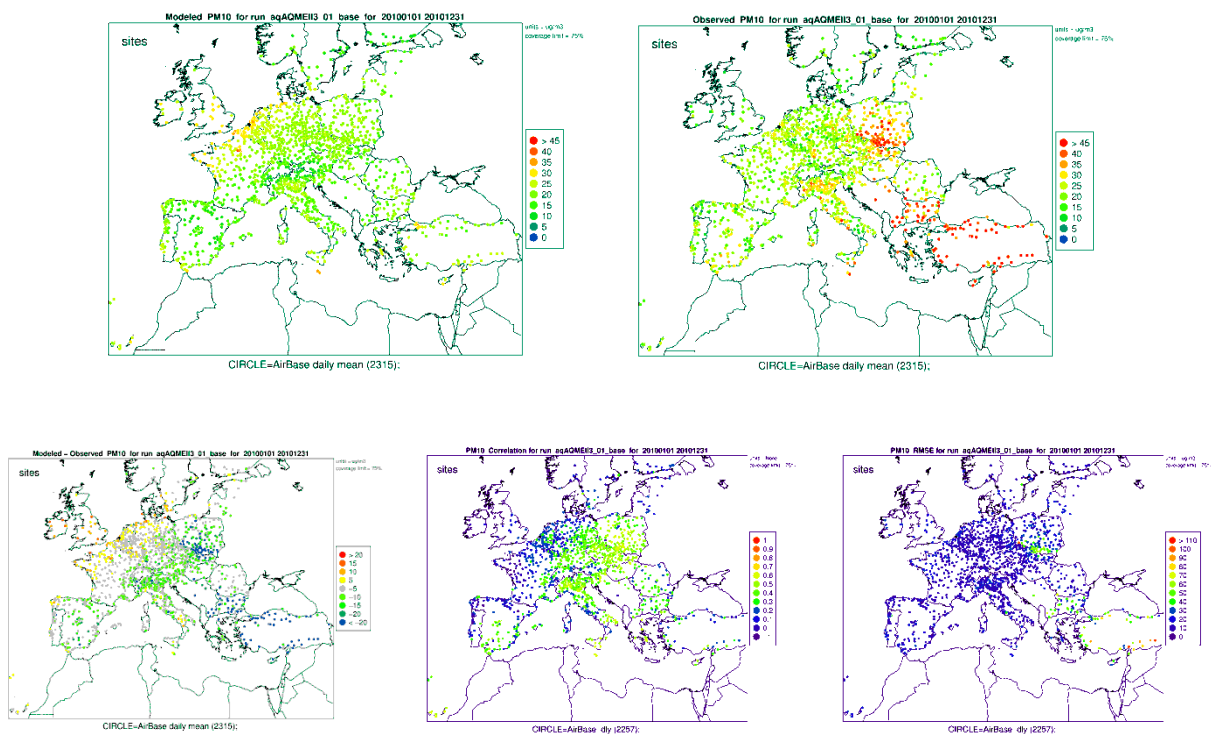

**Figure B9 – Evaluation of CAMx performance for PM<sub>10</sub> at AB Airbase sites. Top panel: modelled and observed yearly mean concentrations. Bottom panel: yearly mean BIAS, Correlation and RMSE values computed for daily concentrations.**

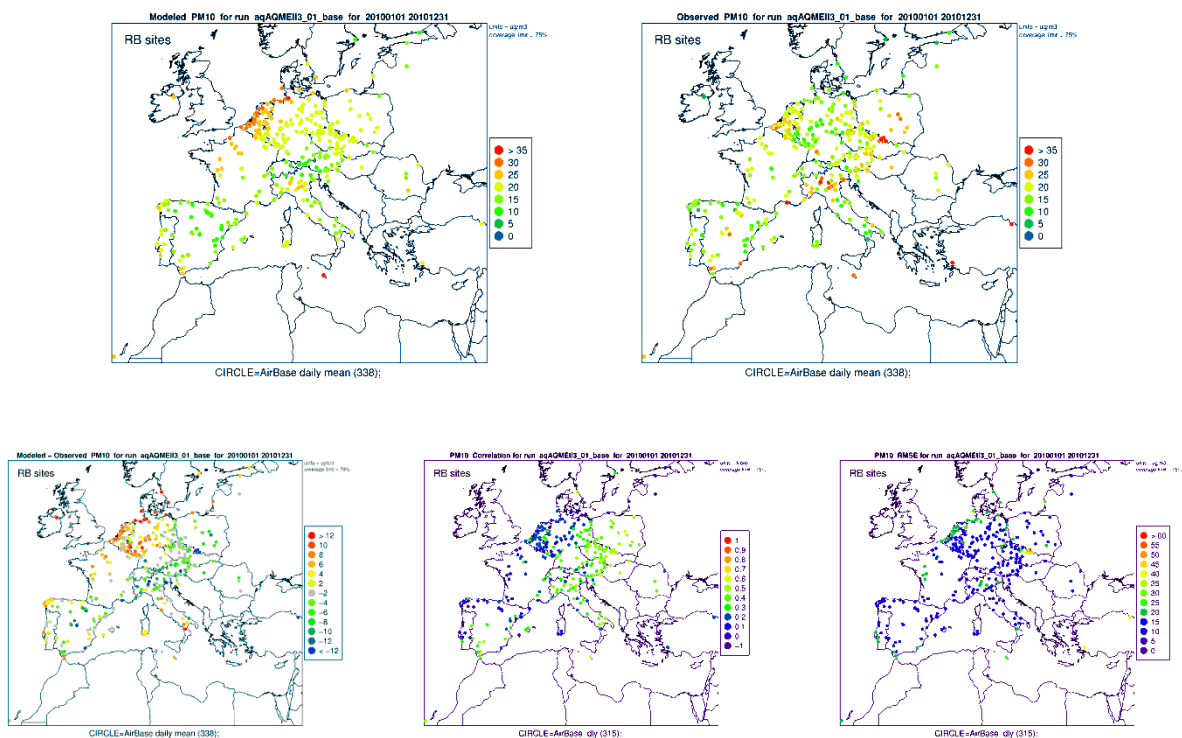

**Figure B10 – Evaluation of CAMx performance for PM<sub>10</sub> at RB Airbase sites. Top panel: modelled and observed yearly mean concentrations. Bottom panel: yearly mean BIAS, Correlation and RMSE values computed for daily concentrations.**

An additional confirmation of the probable overestimation of the contribution of the natural sources to the PM coarse fraction can be derived from the analysis of PM<sub>2.5</sub> results (Figures B11 and B12). The PM fine fraction is better reproduced than PM<sub>10</sub> over the whole Europe in terms of both mean BIAS and temporal correlation. This is particularly evident in Western Europe (UK, France, Benelux and Germany). Differently the model still underestimates observed concentrations in Italy and Eastern Europe, confirming that the model discrepancy in such regions is mostly related to anthropogenic sources. However, it is worth noting that the absolute values of the model bias for PM<sub>2.5</sub> is lower than PM<sub>10</sub>, confirming that as a whole model performance for the PM fine fraction are more reliable than for PM<sub>10</sub>.

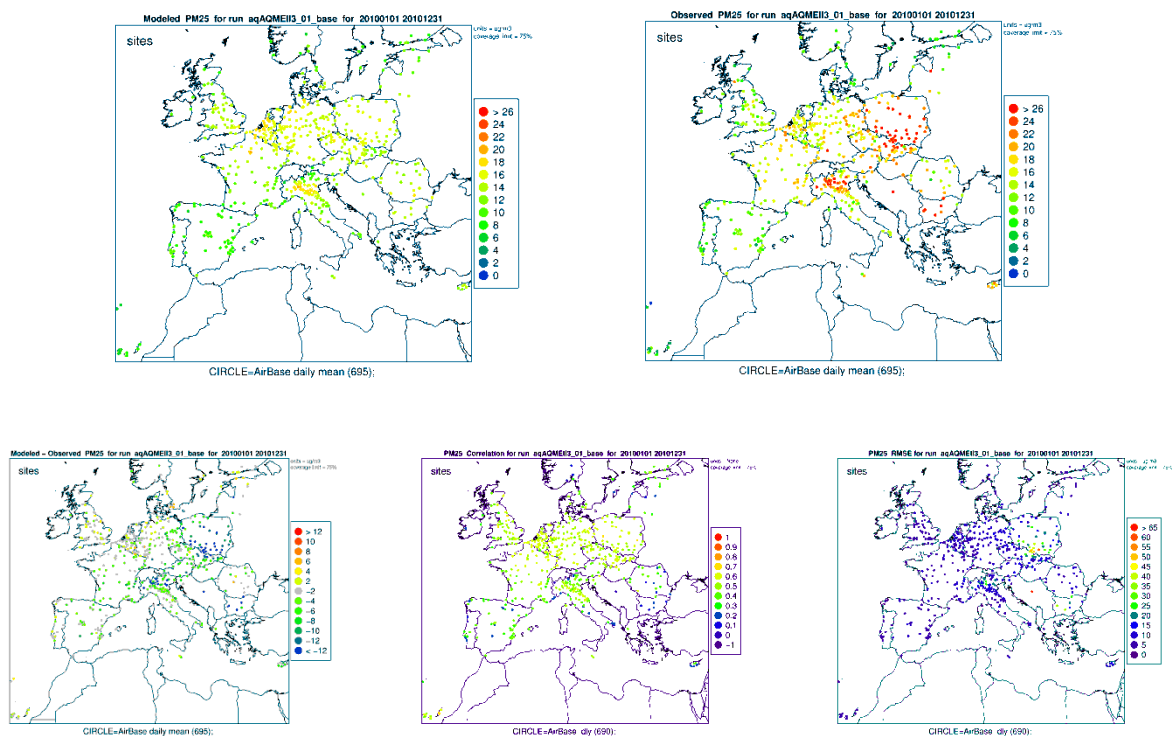

**Figure B11 – Evaluation of CAMx performance for PM<sub>2.5</sub> at AB Airbase sites. Top panel: modelled and observed yearly mean concentrations. Bottom panel: yearly mean BIAS, Correlation and RMSE values computed for daily concentrations.**



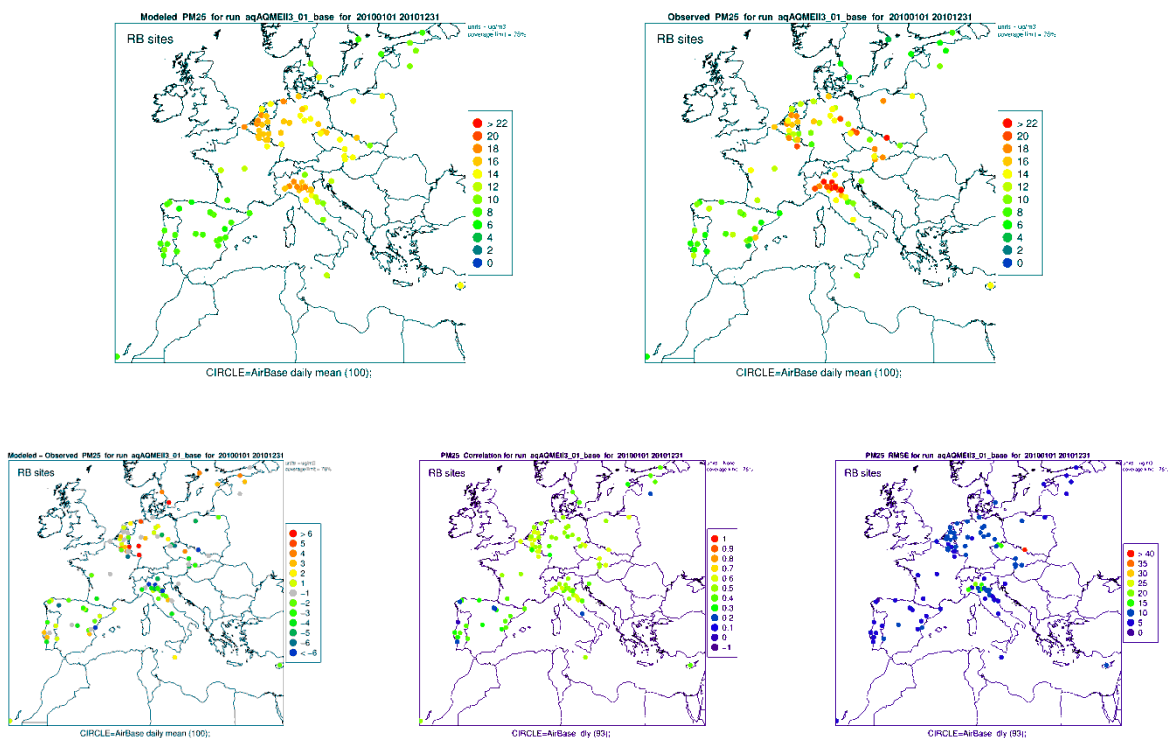

**Figure B12 – Evaluation of CAMx performance for PM<sub>2.5</sub> at RB Airbase sites. Top panel: modelled and observed yearly mean concentrations. Bottom panel: yearly mean BIAS, Correlation and RMSE values computed for daily concentrations.**

## B2. Daily time series

The evaluation of model performance includes also the comparison of the temporal evolution of the daily mean concentration at AB (Figure B13) and RB (Figure B14) sites.

The analysis of the temporal time series confirm most of the previous findings, particularly the systematic underestimation of NO<sub>2</sub> concentration on the one side and the overestimation of the ozone daily mean on the other side. Differently, O<sub>x</sub> concentration is very well reproduced: the model captures the long term seasonal cycle, as well as the different temporal variation taking place at a synoptic scale during the summer season. When moving to RB sites only, the very good performance for O<sub>x</sub> is confirmed, but also the discrepancy for ozone and NO<sub>2</sub> is clearly reduced. Particularly at RB sites the all the main percentiles of the yearly distribution of the observed concentrations are slightly and uniformly overestimated by 2-3 ppb.

The model provides reasonable performance for PM<sub>10</sub> concentration, partially due to an error compensation taking place late winter and during fall, where the model overestimates, and the summer season when the model underestimates. Limiting the analysis to the RB sites only we can observe a substantial improvement during summer, while the overestimation at the end and beginning of cold season are confirmed.

Finally, the analysis of the temporal evolution of CAMx results confirms the good model performance in reproducing the PM<sub>2.5</sub> daily mean concentrations. At AB sites the model correctly reproduces the seasonal evolution also capturing some episodes taking place in February and December. This is confirmed also by the analysis of the main percentiles at both AB and RB only sites.

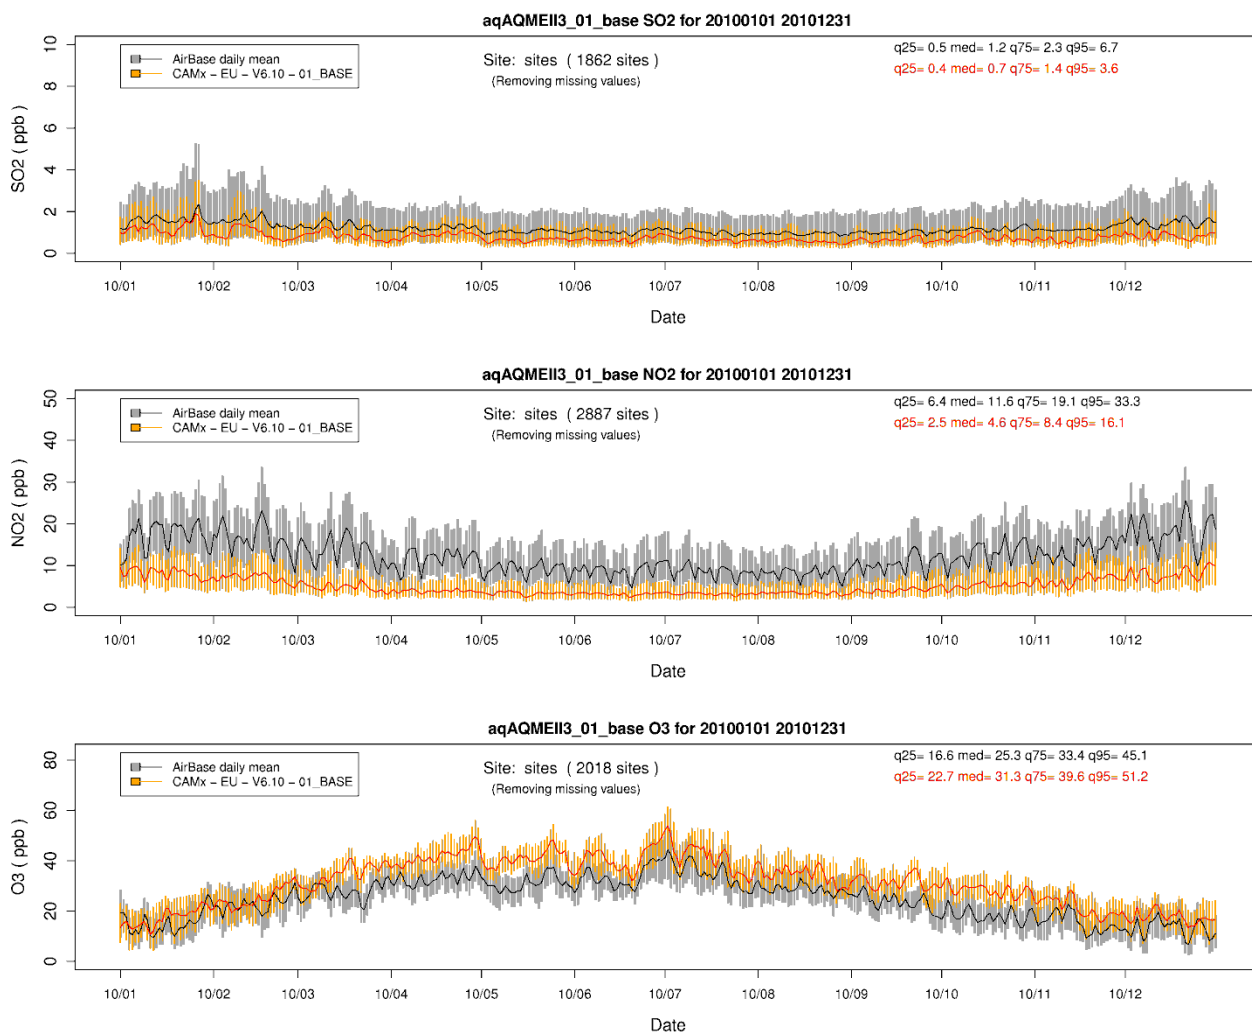

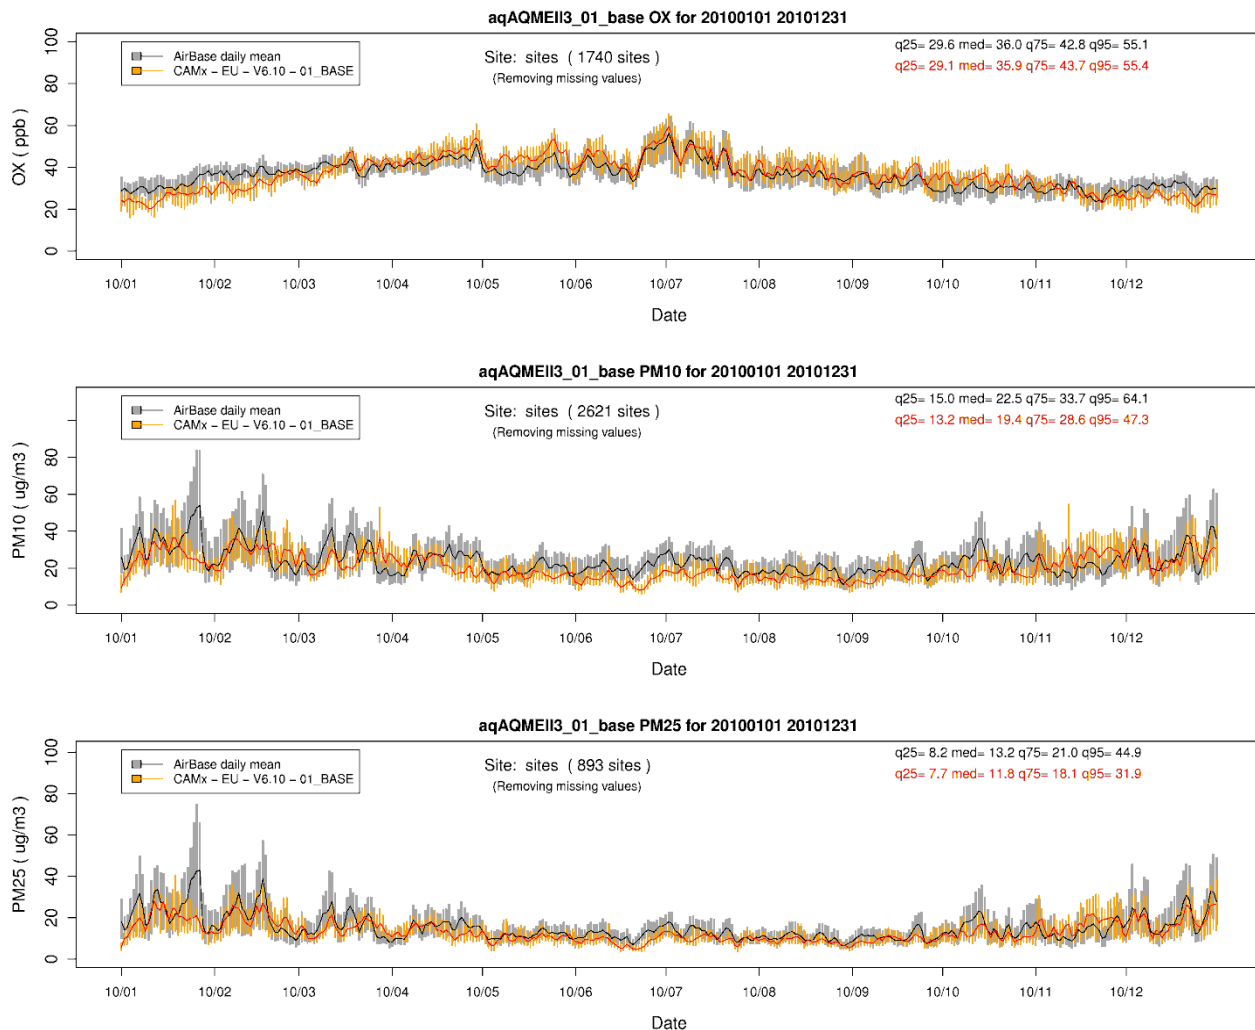

**Figure B13 - Time series of the box and whisker plots for the distribution of the observed (black/grey) and computed (red/orange) daily concentrations of SO<sub>2</sub>, NO<sub>2</sub>, O<sub>3</sub>, OX (=O<sub>3</sub>+NO<sub>2</sub>), PM<sub>10</sub> and PM<sub>2.5</sub> at All Background (AB) Airbase sites. Bars show the interquartile range, lines the median values. Values for the 25th, 50th, 75th, and 95th quantiles of the whole yearly time series are reported too.**

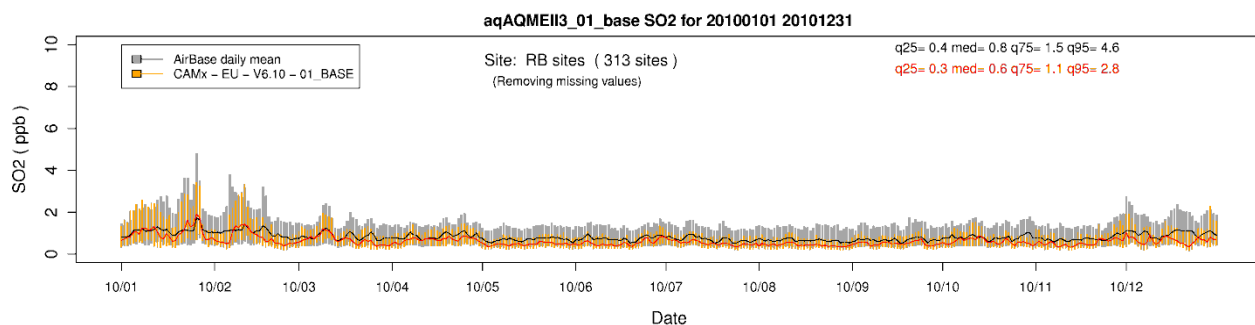

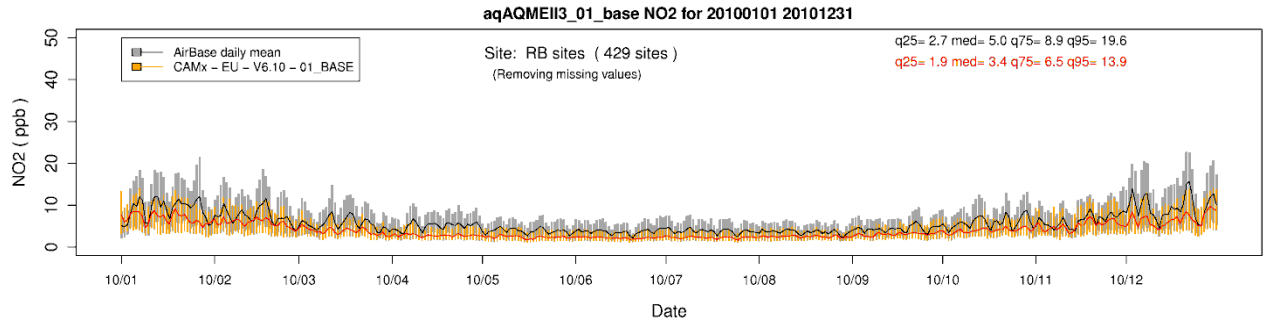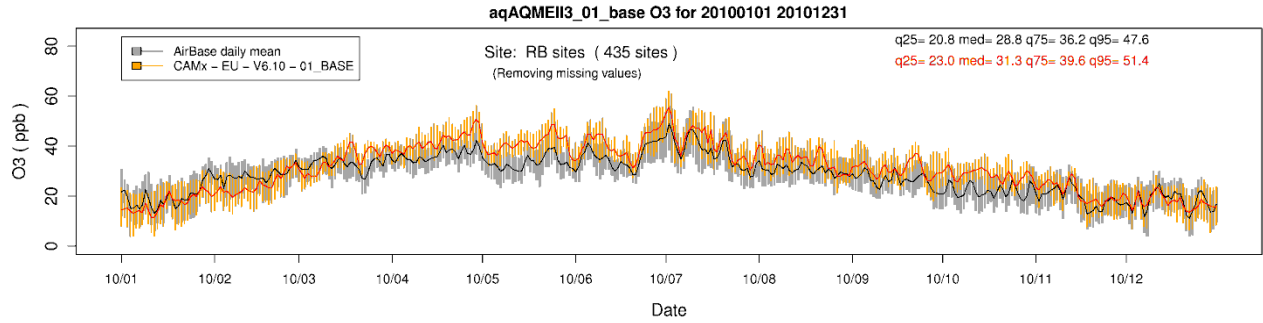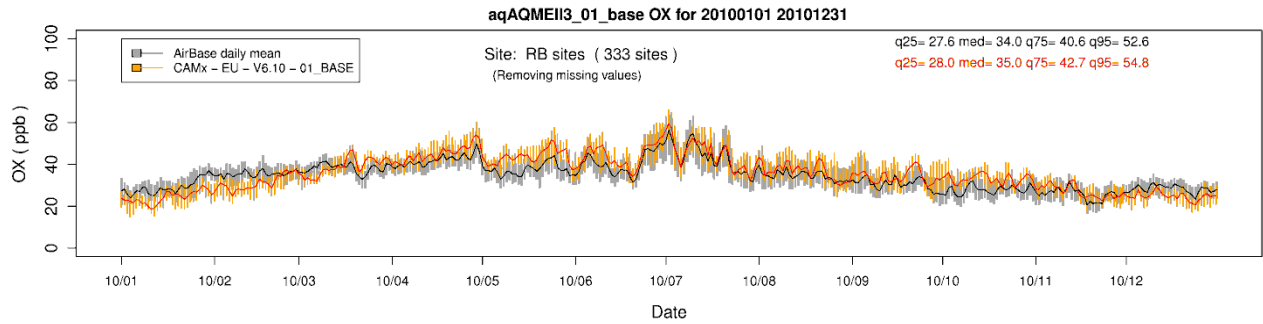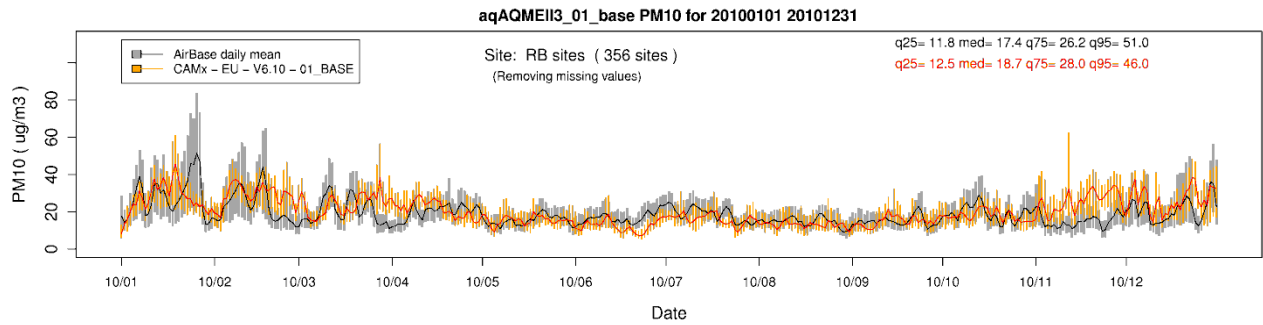

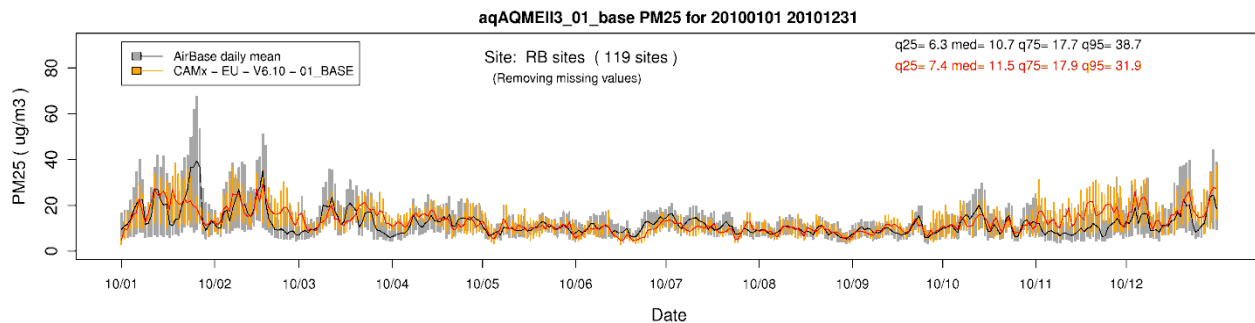

**Figure B14 - Time series of the box and whisker plots for the distribution of the observed (black/grey) and computed (red/orange) daily concentrations of SO<sub>2</sub>, NO<sub>2</sub>, O<sub>3</sub>, O<sub>x</sub> (=O<sub>3</sub>+NO<sub>2</sub>), PM<sub>10</sub> and PM<sub>2.5</sub> at All Background (AB) Airbase sites. Bars show the interquartile range, lines the median values. Values for the 25<sup>th</sup>, 50<sup>th</sup>, 75<sup>th</sup>, and 95<sup>th</sup> quantiles of the whole yearly time series are reported too.**
